# Supplementary material
Source: MDPI journal article supplement (https://www.mdpi.com/2077-0472/11/7/632)
Supplement: s1 [file s1]

**Table S6** Enzyme name abbreviations used in model.

|               |                                                             |
|---------------|-------------------------------------------------------------|
| GSTT1         | Glutathione S-transferase T1                                |
| GSTZ5         | Protein IN2-1 homolog B                                     |
| G6PD6         | Glucose-6-phosphate 1-dehydrogenase 6                       |
| UGD4          | UDP-glucose 6-dehydrogenase 4                               |
| UGD5          | UDP-glucose 6-dehydrogenase 5                               |
| LGALDH        | L-galactose dehydrogenase                                   |
| At5g05600     | Probable 2-oxoglutarate-dependent dioxygenase               |
| APXT          | L-ascorbate peroxidase T                                    |
| VET4          | Probable tocopherol O-methyltransferase                     |
| RT            | Anthocyanidin-3-O-glucoside rhamnosyltransferase            |
| FGT           | Anthocyanidin 3-O-glucosyltransferase 2                     |
| COMT1         | Caffeic acid 3-O-methyltransferase                          |
| CAD6          | Probable cinnamyl alcohol dehydrogenase                     |
| HHT1          | Omega-hydroxypalmitate O-feruloyl transferase               |
| CCD           | Probable carotenoid cleavage dioxygenase                    |
| LCY1          | Lycopene beta cyclase                                       |
| ISA3          | Isoamylase 3                                                |
| DPEP          | 4-alpha-glucanotransferase                                  |
| BAM9          | Inactive beta-amylase 9                                     |
| AMY3          | Alpha-amylase 3                                             |
| SS4           | Probable starch synthase 4                                  |
| SS1           | Starch synthase 1                                           |
| RFS6          | Probable galactinol--sucrose galactosyltransferase 6        |
| AGAL3         | Alpha-galactosidase 3                                       |
| GLN2          | Glutamine synthetase                                        |
| GAD           | Glutamate decarboxylase                                     |
| GABA-TP3      | Gamma aminobutyrate transaminase 3                          |
| ASP3          | Aspartate aminotransferase 3                                |
| NOA1          | NO-associated protein 1                                     |
| SPMS          | Spermine synthase                                           |
| $\delta$ -OAT | $\delta$ -Ornithine aminotransferase                        |
| ADT6          | Arogenate dehydratase/prephenate dehydratase 6              |
| PFK6          | ATP-dependent 6-phosphofructokinase 6                       |
| GAPC          | Glyceraldehyde-3-phosphate dehydrogenase                    |
| ALDH3F1       | Aldehyde dehydrogenase family 3 member F1                   |
| ALDH3H1       | Aldehyde dehydrogenase family 3 member H1                   |
| ACLA-1        | ATP-citrate synthase alpha chain protein 1                  |
| LHCB7         | Chlorophyll a-b binding protein 7                           |
| PSAE-1        | Photosystem I reaction center subunit IV                    |
| PSAH          | Photosystem I reaction center subunit VI                    |
| DEGP2         | Protease Do-like 2                                          |
| PUMP1         | Mitochondrial uncoupling protein 1                          |
| VATE          | V-type proton ATPase subunit E                              |
| CIB22         | NADH dehydrogenase [ubiquinone] 1 beta subcomplex subunit 9 |
| NDB2          | External alternative NAD(P)H-ubiquinone oxidoreductase B2   |
| PPC 1         | Phosphoenolpyruvate carboxylase 1                           |
| PPC 16        | Phosphoenolpyruvate carboxylase 6                           |
| NADP-ME       | NADP-dependent malic enzyme                                 |
| AGPS1         | Glucose-1-phosphate adenyltransferase large subunit 1       |
| LKR/SDH       | Alpha-amino adipic semialdehyde synthase                    |
| CHLP          | Geranylgeranyl diphosphate reductase                        |

|              |                                  |
|--------------|----------------------------------|
| PAO          | Pheophorbide a oxygenase         |
| SDR1         | (+)-neomenthol dehydrogenase     |
| MLP31        | MLP-like protein 31              |
| MLP43        | MLP-like protein 43              |
| PLAT1        | PLAT domain-containing protein 1 |
| Os01g0270100 | Cysteine proteinase inhibitor 12 |
